# Supplementary material for: Ethanol Extract of Aurantiochytrium mangrovei 18W-13a Strain Possesses Anti-inflammatory Effects on Murine Macrophage RAW264 Cells
Source: PubMed Central journal article supplement (PMC6168648; doi:10.3389/fphys.2018.01205), 2018-09-26
Supplement: Table_1.pdf [file Table_1.pdf]

Supplementary table 1. Annotation of genes whose expression was more than 1.4 times higher or lower than that in the control group, following treatment with the AM18W-13a extract for 1 h.

| Gene Symbol   | Gene Name                                                                                | Gene Ontology                                                            |
|---------------|------------------------------------------------------------------------------------------|--------------------------------------------------------------------------|
| <i>Egr2</i>   | early growth response 2                                                                  | regulation of transcription,<br>Zinc finger                              |
| <i>Egr3</i>   | early growth response 3                                                                  | endothelial cell chemotaxis, regulation of<br>transcription, Zinc finger |
| <i>Ier3</i>   | immediate early response 3                                                               | negative regulation of inflammatory response                             |
| <i>Cxcl2</i>  | chemokine (C-X-C motif) ligand 2                                                         | Chemotaxis, inflammatory response                                        |
| <i>Nfkbiz</i> | nuclear factor of kappa light polypeptide gene enhancer in B<br>cells inhibitor, zeta    | inflammatory response, Zinc finger                                       |
| <i>Nfkbie</i> | nuclear factor of kappa light polypeptide gene enhancer in B<br>cells inhibitor, epsilon | T cell receptor signaling pathway                                        |
| <i>Ppm1b</i>  | protein phosphatase 1B, magnesium dependent, beta isoform                                | negative regulation of NF-kappaB import into nucleus,<br>Zinc finger     |

(Continued)

| Gene Symbol    | Gene Title                                                      | Gene Ontology                                                                                 |
|----------------|-----------------------------------------------------------------|-----------------------------------------------------------------------------------------------|
| <i>Traf1</i>   | TNF receptor-associated factor 1                                | positive regulation of NF-kappaB, transcription factor activity, Zinc finger                  |
| <i>Pde4b</i>   | phosphodiesterase 4B, cAMP specific                             | neutrophil chemotaxis, cellular responses to lipopolysaccharide, Zinc finger                  |
| <i>Vapb</i>    | vesicle-associated membrane protein, associated protein B and C | ER to Golgi vesicle-mediated transport                                                        |
| <i>Naa35</i>   | N(alpha)-acetyltransferase 35, NatC auxiliary subunit           | negative regulation of apoptotic process,                                                     |
| <i>Zfp146</i>  | zinc finger protein 146                                         | Transcription regulation, Zinc finger                                                         |
| <i>Hnrnpab</i> | heterogeneous nuclear ribonucleoprotein A/B                     | positive regulation of transcription, Zinc finger                                             |
| <i>Ndufs8</i>  | NADH dehydrogenase (ubiquinone) Fe-S protein 8                  | mitochondrial respiratory chain complex I assembly, response to oxidative stress, Zinc finger |
| <i>Rgs1</i>    | regulator of G-protein signaling 1                              | positive regulation of GTPase activity                                                        |
