# Supplementary material for: Ethanol Extract of Aurantiochytrium mangrovei 18W-13a Strain Possesses Anti-inflammatory Effects on Murine Macrophage RAW264 Cells
Source: PubMed Central journal article supplement (PMC6168648; doi:10.3389/fphys.2018.01205), 2018-09-26
Supplement: Table_2.pdf [file Table_2.pdf]

Supplementary table 2. Genes whose expression was 1.5 times higher than that in the expression in the control group, following treatment with the AM18W-13a extract for 24 h.

| Gene<br>Symbol   | Gene Name                                                                        | Ratio |      |
|------------------|----------------------------------------------------------------------------------|-------|------|
|                  |                                                                                  | 1h    | 24h  |
| <i>Npc2</i>      | Niemann Pick type C2                                                             | 0.89  | 2.41 |
| <i>Ago4</i>      | argonaute RISC catalytic subunit 4                                               | 0.99  | 1.87 |
| <i>St6gal1</i>   | beta galactoside alpha 2,6 sialyltransferase 1                                   | 1.02  | 2.35 |
| <i>Dbp</i>       | D site albumin promoter binding protein                                          | 0.97  | 1.97 |
| <i>Cxcr4</i>     | chemokine (C-X-C motif) receptor 4                                               | 0.95  | 1.99 |
| <i>Gnpda1</i>    | glucosamine-6-phosphate deaminase 1 pseudogene /// glucosamine-6-phosphate deami | 0.87  | 2.05 |
| <i>Apoc2</i>     | apolipoprotein C-II                                                              | 0.91  | 1.94 |
| <i>Tsc22d1</i>   | TSC22 domain family, member 1                                                    | 0.95  | 1.84 |
| <i>Trp53inp1</i> | transformation related protein 53 inducible nuclear protein 1                    | 1.03  | 2.61 |
| <i>Pdcd4</i>     | programmed cell death 4                                                          | 1.01  | 2.47 |
| <i>Lgals9</i>    | lectin, galactose binding, soluble 9                                             | 1.02  | 2.03 |
| <i>Cxcl16</i>    | chemokine (C-X-C motif) ligand 16                                                | 1.00  | 1.72 |
| <i>Usp18</i>     | ubiquitin specific peptidase 18                                                  | 1.06  | 2.26 |
| <i>Rnasel</i>    | ribonuclease L (2', 5'-oligoadenylate synthetase-dependent)                      | 1.09  | 2.30 |
| <i>Hmgcs1</i>    | 3-hydroxy-3-methylglutaryl-Coenzyme A synthase 1                                 | 0.95  | 1.68 |

(Continued)

| Gene<br>Symbol   | Gene Name                                                                    | Ratio |      |
|------------------|------------------------------------------------------------------------------|-------|------|
|                  |                                                                              | 1h    | 24h  |
| <i>Pnpla7</i>    | patatin-like phospholipase domain containing 7                               | 0.93  | 1.95 |
| <i>Hpgd</i>      | hydroxyprostaglandin dehydrogenase 15 (NAD)                                  | 0.91  | 2.17 |
| <i>Sesn1</i>     | sestrin 1                                                                    | 0.92  | 1.76 |
| <i>Cyp4v3</i>    | cytochrome P450, family 4, subfamily v, polypeptide 3                        | 0.97  | 1.88 |
| <i>Mxd4</i>      | Max dimerization protein 4                                                   | 1.07  | 2.12 |
| <i>Cd33</i>      | CD33 antigen                                                                 | 0.93  | 2.11 |
| <i>Ms4a6c</i>    | membrane-spanning 4-domains, subfamily A, member 6C                          | 1.00  | 1.90 |
| <i>Slc5a3</i>    | solute carrier family 5 (inositol transporters), member 3                    | 1.02  | 1.69 |
| <i>Fcgr3</i>     | Fc receptor, IgG, low affinity III                                           | 0.90  | 2.07 |
| <i>Ifi2712a</i>  | interferon, alpha-inducible protein 27 like 2A                               | 1.07  | 2.09 |
| <i>Deptor</i>    | DEP domain containing MTOR-interacting protein                               | 0.96  | 1.73 |
| <i>Cd28</i>      | CD28 antigen                                                                 | 0.93  | 1.86 |
| <i>Clec7a</i>    | C-type lectin domain family 7, member a                                      | 1.02  | 2.00 |
| <i>Aph1b</i>     | anterior pharynx defective 1b homolog (C. elegans)                           | 0.84  | 1.97 |
| <i>Ptplad2</i>   | protein tyrosine phosphatase-like A domain containing 2                      | 0.93  | 1.98 |
| <i>Wfdc17</i>    | extracellular peptidase inhibitor-like /// WAP four-disulfide core domain 17 | 1.02  | 1.83 |
| <i>Ranbp3l</i>   | RAN binding protein 3-like                                                   | 1.08  | 1.82 |
| <i>Rab11fip5</i> | RAB11 family interacting protein 5 (class I)                                 | 0.97  | 1.72 |

(Continued)

| Gene<br>Symbol  | Gene Name                                                                | Ratio |      |
|-----------------|--------------------------------------------------------------------------|-------|------|
|                 |                                                                          | 1h    | 24h  |
| <i>Plxnc1</i>   | plexin C1                                                                | 1.03  | 1.84 |
| <i>Ypel2</i>    | yippee-like 2 (Drosophila)                                               | 0.91  | 1.78 |
| <i>Ms4a6b</i>   | membrane-spanning 4-domains, subfamily A, member 6B                      | 0.95  | 1.88 |
| <i>Lyst</i>     | lysosomal trafficking regulator                                          | 0.97  | 1.77 |
| <i>Mafb</i>     | v-maf musculoaponeurotic fibrosarcoma oncogene family, protein B (avian) | 1.07  | 1.93 |
| <i>Klhl24</i>   | kelch-like 24                                                            | 1.00  | 2.02 |
| <i>BB163080</i> | expressed sequence BB163080                                              | 0.94  | 1.95 |
| <i>Tgfbri</i>   | transforming growth factor, beta receptor I                              | 1.08  | 1.84 |
| <i>Atp6v0d2</i> | ATPase, H <sup>+</sup> transporting, lysosomal V0 subunit D2             | 0.94  | 1.87 |
| <i>S1pr1</i>    | sphingosine-1-phosphate receptor 1                                       | 1.02  | 2.12 |
| <i>Scel</i>     | sciellin                                                                 | 0.91  | 1.84 |
| <i>Blnk</i>     | B cell linker                                                            | 0.99  | 1.87 |
| <i>Tcp1l12</i>  | t-complex 11 (mouse) like 2                                              | 0.98  | 2.05 |
| <i>Id3</i>      | inhibitor of DNA binding 3                                               | 0.99  | 1.79 |
| <i>Bbip1</i>    | BBSome interacting protein 1                                             | 1.03  | 2.07 |
| <i>Rnf144b</i>  | ring finger protein 144B                                                 | 0.99  | 1.65 |

(Continued)

| Gene<br>Symbol | Gene Name                                                                 | Ratio |      |
|----------------|---------------------------------------------------------------------------|-------|------|
|                |                                                                           | 1h    | 24h  |
| <i>Btg2</i>    | B cell translocation gene 2, anti-proliferative                           | 0.94  | 1.69 |
| <i>Il10ra</i>  | interleukin 10 receptor, alpha                                            | 0.79  | 1.78 |
| <i>Tsc22d3</i> | TSC22 domain family, member 3                                             | 1.02  | 1.75 |
| <i>Hebp1</i>   | heme binding protein 1                                                    | 1.01  | 1.75 |
| <i>Rnase4</i>  | ribonuclease, RNase A family 4                                            | 1.02  | 1.75 |
| <i>Rnf180</i>  | ring finger protein 180                                                   | 0.92  | 1.73 |
| <i>Gas6</i>    | growth arrest specific 6                                                  | 0.93  | 1.74 |
| <i>Apobec1</i> | apolipoprotein B mRNA editing enzyme, catalytic polypeptide 1             | 1.04  | 1.69 |
| <i>Tifab</i>   | TRAF-interacting protein with forkhead-associated domain, family member B | 0.97  | 1.76 |
| <i>Ltc4s</i>   | leukotriene C4 synthase                                                   | 1.01  | 1.84 |
| <i>Fam214a</i> | family with sequence similarity 214, member A                             | 0.96  | 1.78 |
| <i>Ctsf</i>    | cathepsin F                                                               | 1.00  | 1.69 |
| <i>Ifi204</i>  | interferon activated gene 204                                             | 0.98  | 1.73 |
| <i>Pik3ip1</i> | phosphoinositide-3-kinase interacting protein 1                           | 0.99  | 1.62 |
| <i>C3ar1</i>   | complement component 3a receptor 1                                        | 1.00  | 1.70 |
| <i>Ifi44</i>   | interferon-induced protein 44                                             | 1.00  | 1.82 |

(Continued)

| Gene<br>Symbol | Gene Name                                                                  | Ratio |      |
|----------------|----------------------------------------------------------------------------|-------|------|
|                |                                                                            | 1h    | 24h  |
| <i>Arl4c</i>   | ADP-ribosylation factor-like 4C                                            | 0.99  | 1.64 |
| <i>Zbtb4</i>   | zinc finger and BTB domain containing 4                                    | 0.99  | 1.62 |
| <i>Ipo11</i>   | importin 11                                                                | 1.03  | 1.71 |
| <i>Epsti1</i>  | epithelial stromal interaction 1 (breast)                                  | 1.01  | 1.64 |
| <i>Irf9</i>    | interferon regulatory factor 9                                             | 1.03  | 1.63 |
| <i>Mndal</i>   | myeloid nuclear differentiation antigen like                               | 1.01  | 1.59 |
| <i>Crebrf</i>  | CREB3 regulatory factor                                                    | 0.93  | 1.65 |
| <i>Rnf166</i>  | ring finger protein 166                                                    | 1.02  | 1.58 |
| <i>Aif1</i>    | allograft inflammatory factor 1                                            | 0.92  | 1.66 |
| <i>Aldoc</i>   | aldolase C, fructose-bisphosphate                                          | 1.01  | 1.60 |
| <i>Bmf</i>     | BCL2 modifying factor                                                      | 1.01  | 1.60 |
| <i>Slfn8</i>   | schlafen 8                                                                 | 0.99  | 1.61 |
| <i>Il6ra</i>   | interleukin 6 receptor, alpha                                              | 1.07  | 1.56 |
| <i>Rmnd5a</i>  | required for meiotic nuclear division 5 homolog A ( <i>S. cerevisiae</i> ) | 0.97  | 1.58 |
| <i>Malat1</i>  | metastasis associated lung adenocarcinoma transcript 1 (non-coding RNA)    | 1.23  | 1.56 |
| <i>Ap1s2</i>   | adaptor-related protein complex 1, sigma 2 subunit                         | 0.95  | 1.55 |

(Continued)

| Gene<br>Symbol | Gene Name                                                    | Ratio |      |
|----------------|--------------------------------------------------------------|-------|------|
|                |                                                              | 1h    | 24h  |
| <i>Ifi203</i>  | interferon activated gene 203                                | 1.07  | 1.65 |
| <i>Asb10</i>   | ankyrin repeat and SOCS box-containing 10                    | 0.97  | 1.63 |
| <i>Sla</i>     | src-like adaptor                                             | 1.02  | 1.53 |
| <i>Mvd</i>     | mevalonate (diphospho) decarboxylase                         | 1.05  | 1.57 |
| <i>Amz1</i>    | archaelysin family metallopeptidase 1                        | 0.97  | 1.55 |
| <i>Slc29a3</i> | solute carrier family 29 (nucleoside transporters), member 3 | 0.94  | 1.54 |
| <i>Tmem86a</i> | transmembrane protein 86A                                    | 0.93  | 1.58 |
| <i>Klf3</i>    | Kruppel-like factor 3 (basic)                                | 1.01  | 1.57 |
| <i>Itgb5</i>   | integrin beta 5                                              | 0.96  | 1.65 |
| <i>Rpl22</i>   | ribosomal protein L22                                        | 0.99  | 1.56 |
| <i>Frm4b</i>   | FERM domain containing 4B                                    | 1.18  | 1.54 |
| <i>Rassf2</i>  | Ras association (RalGDS/AF-6) domain family member 2         | 1.01  | 1.52 |
| <i>Tcf4</i>    | transcription factor 4                                       | 1.02  | 1.55 |
| <i>Camk1</i>   | calcium/calmodulin-dependent protein kinase I                | 0.95  | 1.52 |
| <i>Il18</i>    | interleukin 18                                               | 1.01  | 1.52 |
| <i>Enc1</i>    | ectodermal-neural cortex 1                                   | 1.14  | 1.53 |
| <i>Pnrc1</i>   | proline-rich nuclear receptor coactivator 1                  | 0.90  | 1.57 |

(Continued)

| Gene<br>Symbol | Gene Name                                                | 1h   | 24h  |
|----------------|----------------------------------------------------------|------|------|
| <i>Gm19773</i> | predicted gene, 19773                                    | 0.95 | 1.53 |
| <i>Cp</i>      | ceruloplasmin                                            | 0.95 | 1.53 |
| <i>Tbc1d16</i> | TBC1 domain family, member 16                            | 1.00 | 1.58 |
| <i>C1qb</i>    | complement component 1, q subcomponent, beta polypeptide | 1.03 | 1.60 |

The values indicate the average of results obtained from independent experiments performed in duplicate or triplicate.
