# Supplementary material for: Ethanol Extract of Aurantiochytrium mangrovei 18W-13a Strain Possesses Anti-inflammatory Effects on Murine Macrophage RAW264 Cells
Source: PubMed Central journal article supplement (PMC6168648; doi:10.3389/fphys.2018.01205), 2018-09-26
Supplement: Table_3.pdf [file Table_3.pdf]

Supplementary table 3. Genes whose expression was more than 1.5 times lower than that in the control group, following treatment with the AM18W-13a extract for 24 h.

| Gene<br>Symbol | Gene Name                                                                       | Ratio |      |
|----------------|---------------------------------------------------------------------------------|-------|------|
|                |                                                                                 | 1h    | 24h  |
| <i>Afp</i>     | alpha fetoprotein                                                               | 1.01  | 0.29 |
| <i>Trem14</i>  | triggering receptor expressed on myeloid cells-like 4                           | 0.99  | 0.19 |
| <i>Hmox1</i>   | heme oxygenase (decycling) 1                                                    | 1.34  | 0.31 |
| <i>Gsta3</i>   | glutathione S-transferase, alpha 3                                              | 1.13  | 0.40 |
| <i>Ptgs2</i>   | prostaglandin-endoperoxide synthase 2                                           | 1.12  | 0.39 |
| <i>Slc40a1</i> | solute carrier family 40 (iron-regulated transporter), member 1                 | 0.99  | 0.26 |
| <i>Slc7a11</i> | solute carrier family 7 (cationic amino acid transporter, y+ system), member 11 | 0.88  | 0.30 |
| <i>Blvrb</i>   | biliverdin reductase B (flavin reductase (NADPH))                               | 0.93  | 0.29 |
| <i>Slc7a1</i>  | solute carrier family 7 (cationic amino acid transporter, y+ system), member 1  | 0.93  | 0.49 |
| <i>Gclm</i>    | glutamate-cysteine ligase, modifier subunit                                     | 1.01  | 0.27 |
| <i>Akr1b8</i>  | aldo-keto reductase family 1, member B8                                         | 1.02  | 0.28 |
| <i>Fcrl1</i>   | Fc receptor-like 1                                                              | 0.97  | 0.40 |
| <i>Adh7</i>    | alcohol dehydrogenase 7 (class IV), mu or sigma polypeptide                     | 1.00  | 0.37 |
| <i>Procr</i>   | protein C receptor, endothelial                                                 | 0.87  | 0.32 |
| <i>Ptgir</i>   | prostaglandin I receptor (IP)                                                   | 0.91  | 0.44 |
| <i>Srxn1</i>   | sulfiredoxin 1 homolog ( <i>S. cerevisiae</i> )                                 | 0.95  | 0.40 |

(Continued)

| Gene<br>Symbol  | Gene Name                                                    | Ratio |      |
|-----------------|--------------------------------------------------------------|-------|------|
|                 |                                                              | 1h    | 24h  |
| <i>Ccl3</i>     | chemokine (C-C motif) ligand 3                               | 1.12  | 0.34 |
| <i>Pcx</i>      | pyruvate carboxylase                                         | 1.00  | 0.52 |
| <i>Layn</i>     | layilin                                                      | 0.98  | 0.43 |
| <i>Clec4n</i>   | C-type lectin domain family 4, member n                      | 0.92  | 0.41 |
| <i>Dusp4</i>    | dual specificity phosphatase 4                               | 0.92  | 0.39 |
| <i>Dnmt3l</i>   | DNA (cytosine-5-)-methyltransferase 3-like                   | 1.13  | 0.39 |
| <i>Gbe1</i>     | glucan (1,4-alpha-), branching enzyme 1                      | 1.12  | 0.40 |
| <i>Nrp1</i>     | neuropilin 1                                                 | 0.98  | 0.45 |
| <i>Plk2</i>     | polo-like kinase 2                                           | 1.01  | 0.39 |
| <i>Gstp1</i>    | glutathione S-transferase, pi 1                              | 1.01  | 0.46 |
| <i>Hs3st3b1</i> | heparan sulfate (glucosamine) 3-O-sulfotransferase 3B1       | 1.12  | 0.44 |
| <i>Cd36</i>     | CD36 antigen                                                 | 0.98  | 0.41 |
| <i>Gsr</i>      | glutathione reductase                                        | 0.95  | 0.46 |
| <i>Dcstamp</i>  | dentocyte expressed seven transmembrane protein              | 1.05  | 0.46 |
| <i>Serp1b1b</i> | serine (or cysteine) peptidase inhibitor, clade B, member 1b | 1.07  | 0.51 |
| <i>Rnf128</i>   | ring finger protein 128                                      | 0.97  | 0.50 |
| <i>Serp1b9</i>  | serine (or cysteine) peptidase inhibitor, clade B, member 9  | 1.03  | 0.47 |

(Continued)

| Gene<br>Symbol  | Gene Name                                                                        | Ratio |      |
|-----------------|----------------------------------------------------------------------------------|-------|------|
|                 |                                                                                  | 1h    | 24h  |
| <i>Cat</i>      | catalase                                                                         | 0.92  | 0.51 |
| <i>Mfap3l</i>   | microfibrillar-associated protein 3-like                                         | 1.11  | 0.52 |
| <i>Serpine1</i> | serine (or cysteine) peptidase inhibitor, clade E, member 1                      | 1.14  | 0.44 |
| <i>Esd</i>      | esterase D/formylglutathione hydrolase                                           | 0.91  | 0.47 |
| <i>Glrx</i>     | glutaredoxin                                                                     | 0.91  | 0.53 |
| <i>Prkar2b</i>  | protein kinase, cAMP dependent regulatory, type II beta                          | 1.02  | 0.52 |
| <i>Slc11a1</i>  | solute carrier family 11 (proton-coupled divalent metal ion transporters), membe | 0.90  | 0.47 |
| <i>Flrt2</i>    | fibronectin leucine rich transmembrane protein 2                                 | 1.04  | 0.47 |
| <i>Ccl4</i>     | chemokine (C-C motif) ligand 4                                                   | 1.12  | 0.43 |
| <i>Fosl1</i>    | fos-like antigen 1                                                               | 1.11  | 0.43 |
| <i>Fkbp11</i>   | FK506 binding protein 11                                                         | 1.04  | 0.48 |
| <i>Slc48a1</i>  | solute carrier family 48 (heme transporter), member 1                            | 1.01  | 0.50 |
| <i>Ehd1</i>     | EH-domain containing 1                                                           | 0.92  | 0.55 |
| <i>Plaur</i>    | plasminogen activator, urokinase receptor                                        | 0.92  | 0.46 |
| <i>Dmwd</i>     | dystrophia myotonica-containing WD repeat motif                                  | 0.91  | 0.51 |
| <i>Lpl</i>      | lipoprotein lipase                                                               | 0.87  | 0.48 |
| <i>Jag1</i>     | jagged 1                                                                         | 0.91  | 0.48 |

(Continued)

| Gene<br>Symbol | Gene Name                                                             | Ratio |      |
|----------------|-----------------------------------------------------------------------|-------|------|
|                |                                                                       | 1h    | 24h  |
| <i>Tfrc</i>    | transferrin receptor                                                  | 0.97  | 0.53 |
| <i>Msantd3</i> | Myb/SANT-like DNA-binding domain containing 3                         | 0.89  | 0.56 |
| <i>Slpi</i>    | secretory leukocyte peptidase inhibitor                               | 1.01  | 0.52 |
| <i>Trem3</i>   | triggering receptor expressed on myeloid cells 3                      | 0.97  | 0.57 |
| <i>Gfpt1</i>   | glutamine fructose-6-phosphate transaminase 1                         | 1.05  | 0.51 |
| <i>Txnrd1</i>  | thioredoxin reductase 1                                               | 0.95  | 0.56 |
| <i>Creg1</i>   | cellular repressor of E1A-stimulated genes 1                          | 0.92  | 0.55 |
| <i>Flt1</i>    | FMS-like tyrosine kinase 1                                            | 1.03  | 0.54 |
| <i>Igf2bp2</i> | insulin-like growth factor 2 mRNA binding protein 2                   | 1.00  | 0.50 |
| <i>S100a8</i>  | S100 calcium binding protein A8 (calgranulin A)                       | 1.06  | 0.53 |
| <i>Plau</i>    | plasminogen activator, urokinase                                      | 0.99  | 0.53 |
| <i>Msr1</i>    | macrophage scavenger receptor 1                                       | 0.81  | 0.58 |
| <i>Pip5k1b</i> | phosphatidylinositol-4-phosphate 5-kinase, type 1 beta                | 0.98  | 0.58 |
| <i>Gch1</i>    | GTP cyclohydrolase 1                                                  | 1.02  | 0.54 |
| <i>Hmga2</i>   | high mobility group AT-hook 2                                         | 0.97  | 0.54 |
| <i>Slc16a3</i> | solute carrier family 16 (monocarboxylic acid transporters), member 3 | 1.12  | 0.58 |
| <i>Abcc1</i>   | ATP-binding cassette, sub-family C (CFTR/MRP), member 1               | 1.08  | 0.54 |

(Continued)

| Gene<br>Symbol | Gene Name                                                                     | Ratio |      |
|----------------|-------------------------------------------------------------------------------|-------|------|
|                |                                                                               | 1h    | 24h  |
| <i>Cdr2</i>    | cerebellar degeneration-related 2                                             | 1.02  | 0.57 |
| <i>Ninj1</i>   | ninjurin 1                                                                    | 0.83  | 0.56 |
| <i>Tubb2a</i>  | tubulin, beta 2A class IIA                                                    | 0.97  | 0.57 |
| <i>Pdgfb</i>   | platelet derived growth factor, B polypeptide                                 | 1.12  | 0.53 |
| <i>Phlda1</i>  | pleckstrin homology-like domain, family A, member 1                           | 1.04  | 0.56 |
| <i>Spink5</i>  | serine peptidase inhibitor, Kazal type 5                                      | 0.94  | 0.47 |
| <i>Tmem26</i>  | transmembrane protein 26                                                      | 1.10  | 0.51 |
| <i>Gpr84</i>   | G protein-coupled receptor 84                                                 | 0.77  | 0.53 |
| <i>Pcdh7</i>   | protocadherin 7                                                               | 1.01  | 0.56 |
| <i>Irg1</i>    | immunoresponsive gene 1                                                       | 0.94  | 0.48 |
| <i>Lrp8</i>    | low density lipoprotein receptor-related protein 8, apolipoprotein e receptor | 0.90  | 0.57 |
| <i>Slc2a1</i>  | solute carrier family 2 (facilitated glucose transporter), member 1           | 1.03  | 0.58 |
| <i>Aldh1l2</i> | aldehyde dehydrogenase 1 family, member L2                                    | 1.23  | 0.54 |
| <i>Tnf</i>     | tumor necrosis factor                                                         | 0.68  | 0.56 |
| <i>Ppap2a</i>  | phosphatidic acid phosphatase type 2A                                         | 0.84  | 0.54 |
| <i>Cbr3</i>    | carbonyl reductase 3                                                          | 0.92  | 0.59 |

(Continued)

| Gene<br>Symbol | Gene Name                                                                                       | Ratio |      |
|----------------|-------------------------------------------------------------------------------------------------|-------|------|
|                |                                                                                                 | 1h    | 24h  |
| <i>Mthfd2</i>  | methylenetetrahydrofolate dehydrogenase (NAD <sup>+</sup> dependent),<br>methenyltetrahydrofola | 1.00  | 0.54 |
| <i>Rgs1</i>    | regulator of G-protein signaling 1                                                              | 1.70  | 0.51 |
| <i>Pdlim7</i>  | PDZ and LIM domain 7                                                                            | 1.09  | 0.59 |
| <i>Creld2</i>  | cysteine-rich with EGF-like domains 2                                                           | 0.82  | 0.56 |

The values indicate the average of results obtained from independent experiments performed in duplicate or triplicate.
