# Supplementary material for: Ethanol Extract of Aurantiochytrium mangrovei 18W-13a Strain Possesses Anti-inflammatory Effects on Murine Macrophage RAW264 Cells
Source: PubMed Central journal article supplement (PMC6168648; doi:10.3389/fphys.2018.01205), 2018-09-26
Supplement: Table_4.pdf [file Table_4.pdf]

Supplementary table 4. Annotation of selected genes whose expression was more than 1.5 times lower than that in the control group, following treatment with the AM18W-13a extract for 24 h.

| Gene Symbol   | Gene Name                                               | Gene Ontology                                                                             |
|---------------|---------------------------------------------------------|-------------------------------------------------------------------------------------------|
| <i>Abcc1</i>  | ATP-binding cassette, sub-family C (CFTR/MRP), member 1 | Cell chemotaxis, response to oxidative stress                                             |
| <i>Ccl3</i>   | chemokine (C-C motif) ligand 3                          | monocyte chemotaxis, inflammatory response, lipopolysaccharide-mediated signaling pathway |
| <i>Ccl4</i>   | chemokine (C-C motif) ligand 4                          | monocyte chemotaxis, inflammatory response, lipopolysaccharide-mediated signaling pathway |
| <i>Flt1</i>   | FMS-like tyrosine kinase 1                              | Angiogenesis, monocyte chemotaxis                                                         |
| <i>Nrp1</i>   | neuropilin 1                                            | Angiogenesis, positive chemotaxis, response to wounding                                   |
| <i>Pdgfb</i>  | platelet derived growth factor, B polypeptide           | monocyte chemotaxis, substrate-dependent cell migration                                   |
| <i>Plau</i>   | plasminogen activator, urokinase                        | positive regulation of cell migration, wound healing, NF-kappa B signaling pathway        |
| <i>S100a8</i> | S100 calcium binding protein A8 (calgranulin A)         | immune system process, chemotaxis leukocyte migration involved in inflammatory response   |

(Continued)

|                                                              | Gene Symbol     | Gene Name                                                                        | Gene Ontology                                                                                        |
|--------------------------------------------------------------|-----------------|----------------------------------------------------------------------------------|------------------------------------------------------------------------------------------------------|
| Cluster 5<br>(Inflammatory<br>response)                      | <i>Irg1</i>     | immunoresponsive gene 1                                                          | immune system process, inflammatory response, response to lipopolysaccharide                         |
|                                                              | <i>Serpine1</i> | serine (or cysteine) peptidase inhibitor, clade E, member 1                      | positive regulation of inflammatory response, cellular response to lipopolysaccharide, wound healing |
|                                                              | <i>Tnf</i>      | tumor necrosis factor                                                            | IL-10 Anti-inflammatory Signaling Pathway, response to lipopolysaccharide                            |
|                                                              | <i>Trem3</i>    | triggering receptor expressed on myeloid cells 3                                 | neutrophil chemotaxis, lipopolysaccharide binding                                                    |
| Cluster 9<br>(Cytokine-cyto<br>kine receptor<br>interaction) | <i>Cd36</i>     | CD36 antigen                                                                     | positive regulation of interleukin-6 production, cellular response to lipopolysaccharide             |
|                                                              | <i>Clec4n</i>   | C-type lectin domain family 4, member n                                          | adaptive immune response                                                                             |
|                                                              | <i>Dcstamp</i>  | dendrocyte expressed seven transmembrane protein                                 | immune system process, cellular response to interleukin-4                                            |
|                                                              | <i>Serpinb9</i> | serine (or cysteine) peptidase inhibitor, clade B, member 9                      | acute inflammatory response to antigenic stimulus, T cell mediated cytotoxicity                      |
|                                                              | <i>Slc11a1</i>  | solute carrier family 11 (proton-coupled divalent metal ion transporters), membe | cellular response to lipopolysaccharide, wound healing                                               |
|                                                              | <i>Slpi</i>     | secretory leukocyte peptidase inhibitor                                          | Immune response response to lipopolysaccharide                                                       |

(Continued)

| Gene Symbol    | Gene Name                                               | Gene Ontology                                                                              |
|----------------|---------------------------------------------------------|--------------------------------------------------------------------------------------------|
| <i>Gch1</i>    | GTP cyclohydrolase 1                                    | response to lipopolysaccharide, response to tumor necrosis factor                          |
| <i>Gstp1</i>   | glutathione S-transferase, pi 1                         | cellular response to lipopolysaccharide, response to tumor necrosis factor                 |
| <i>Hmox1</i>   | heme oxygenase (decycling) 1                            | IL-10 Anti-inflammatory Signaling Pathway, wound healing involved in inflammatory response |
| <i>Ptgir</i>   | prostaglandin I receptor (IP)                           | inflammatory response, response to lipopolysaccharide                                      |
| <i>Ptgs2</i>   | prostaglandin-endoperoxide synthase 2                   | inflammatory response, response to lipopolysaccharide                                      |
| <i>Prkar2b</i> | protein kinase, cAMP dependent regulatory, type II beta | cAMP dependent regulatory, Nitric Oxide Signaling Pathway                                  |
