# Supplementary material for: Ethanol Extract of Aurantiochytrium mangrovei 18W-13a Strain Possesses Anti-inflammatory Effects on Murine Macrophage RAW264 Cells
Source: PubMed Central journal article supplement (PMC6168648; doi:10.3389/fphys.2018.01205), 2018-09-26
Supplement: Table_5.pdf [file Table_5.pdf]

Supplementary table 5. Annotation of selected genes whose expression was more than 1.5 times higher than that in the control group, following treatment with the AM18W-13a extract for 24 h.

| Gene Symbol              | Gene Name                                                      | Gene Ontology                                                                                                  |
|--------------------------|----------------------------------------------------------------|----------------------------------------------------------------------------------------------------------------|
| <i>Aif1</i>              | allograft inflammatory factor 1                                | inflammatory response,<br>positive regulation of monocyte chemotaxis                                           |
| <i>Cxcl16</i>            | chemokine (C-X-C motif) ligand<br>16                           | receptor-mediated endocytosis, T cell chemotaxis, response to<br>lipopolysaccharide                            |
| <i>Cxcr4</i>             | chemokine (C-X-C motif)<br>receptor 4                          | regulation of chemotaxis                                                                                       |
| Cluster1<br>(Chemotaxis) | <i>C3ar1</i><br>complement component 3a<br>receptor 1          | complement receptor mediated signaling pathway, chemotaxis,<br>inflammatory response                           |
|                          | <i>Lgals9</i><br>lectin, galactose binding, soluble<br>9       | immune system process, chemotaxis,<br>response to lipopolysaccharide                                           |
|                          | <i>Slpr1</i><br>sphingosine-1-phosphate<br>receptor 1          | leukocyte chemotaxis,<br>positive regulation of positive chemotaxis                                            |
|                          | <i>Tgfb1</i><br>transforming growth factor, beta<br>receptor I | NFkB activation by Nontypeable Hemophilus influenzae                                                           |
|                          | <i>Gas6</i><br>growth arrest specific 6                        | positive regulation of cytokine-mediated signaling pathway,<br>negative regulation of interleukin-6 production |

(Continued)

|                                                              | Gene Symbol   | Gene Name                                  | Gene Ontology                                                                                                       |
|--------------------------------------------------------------|---------------|--------------------------------------------|---------------------------------------------------------------------------------------------------------------------|
| Cluster 5<br>(Inflammatory<br>response)                      | <i>Clec7a</i> | C-type lectin domain family 7,<br>member a | leukocyte activation involved in immune response,<br>inflammatory response                                          |
|                                                              | <i>Fcgr3</i>  | Fc receptor, IgG, low affinity III         | neutrophil chemotaxis,<br>regulation of immune response                                                             |
| Cluster 9<br>(Cytokine-cyto<br>kine receptor<br>interaction) | <i>Blnk</i>   | B cell linker                              | immune response                                                                                                     |
|                                                              | <i>Cd28</i>   | CD28 antigen                               | immune response,<br>positive regulation of interleukin-10 production,                                               |
|                                                              | <i>Ifi44l</i> | interferon-induced protein 44              | immune response,<br>Jak-STAT signaling pathway                                                                      |
|                                                              | <i>Il6ra</i>  | interleukin 6 receptor, alpha              | positive regulation of interleukin-6 production, positive<br>regulation of JAK-STAT cascade                         |
|                                                              | <i>Il10ra</i> | interleukin 10 receptor, alpha             | :IL-10 Anti-inflammatory Signaling Pathway, interleukin-10<br>receptor activity,                                    |
|                                                              | <i>Il18</i>   | interleukin 18                             | :IL12 and Stat4 Dependent Signaling Pathway in Th1<br>Development,<br>lipopolysaccharide-mediated signaling pathway |

(Continued)

|                          | Gene Symbol    | Gene Name                                                                       | Gene Ontology                                                                   |
|--------------------------|----------------|---------------------------------------------------------------------------------|---------------------------------------------------------------------------------|
| Cluster 17<br>(Immunity) | <i>C1qb</i>    | complement component 1, q<br>subcomponent, beta polypeptide                     | innate immune response                                                          |
|                          | <i>Id3</i>     | inhibitor of DNA binding 3                                                      | response to wounding                                                            |
|                          | <i>Irf9</i>    | interferon regulatory factor 9                                                  | IFN alpha signaling pathway, Jak-STAT signaling pathway                         |
| Others                   | <i>Lyst</i>    | lysosomal trafficking regulator                                                 | neutrophil mediated immunity,<br>eukocyte chemotaxis                            |
|                          | <i>St6gal1</i> | beta galactoside alpha 2,6<br>sialyltransferase 1                               | negative regulation of chemotaxis                                               |
|                          | <i>Tifab</i>   | TRAF-interacting protein with<br>forkhead-associated domain, family<br>member B | I-kappaB kinase/NF-kappaB signaling,                                            |
|                          | <i>Tsc22d3</i> | TSC22 domain family, member 3                                                   | negative regulation of activation-induced cell death of T<br>cells, AP1-binding |
